# Supplementary material for: TIP60 governs the auto-ubiquitination of UHRF1 through USP7 dissociation from the UHRF1/USP7 complex
Source: PubMed Central journal article supplement — Int J Oncol. 2021 Sep 23;59(5):89. doi: 10.3892/ijo.2021.5269 (PMC8480382; doi:10.3892/ijo.2021.5269), 2021-09-23
Supplement: Supplementary_Data.pdf [file Supplementary_Data.pdf]

Figure S1. TIP60 overexpression leads to the downregulation of UHRF1 and DNMT1 levels. (A and B) Immunostaining of UHRF1 and DNMT1 in HeLa cells. Either TIP60-eGFP WT or TIP60 $\Delta$ MYST-eGFP mutant was transiently overexpressed. Cells were fixed following transfection and labeled with either anti-UHRF1 or anti-DNMT1 antibody and then with Alexa 568-labeled secondary antibody before visualization in confocal microscopy. Scale bar, 10  $\mu$ m. eGFP-transfected cells served as a negative control. (C and D) Mean fluorescence intensities representing the levels of UHRF1 and DNMT1 in different samples. Values are the mean  $\pm$  SEM for three independent experiments; \*\*\*\*P<0.0001 (vs. eGFP control group). One-way ANOVA with Tukey's post hoc test was used for analysis. UHRF1, ubiquitin-like, containing PHD and RING finger domains 1; TIP60, Tat interactive protein, 60 kDa; USP7, ubiquitin-specific-processing protease 7; DNMT1, DNA methyltransferase 1.

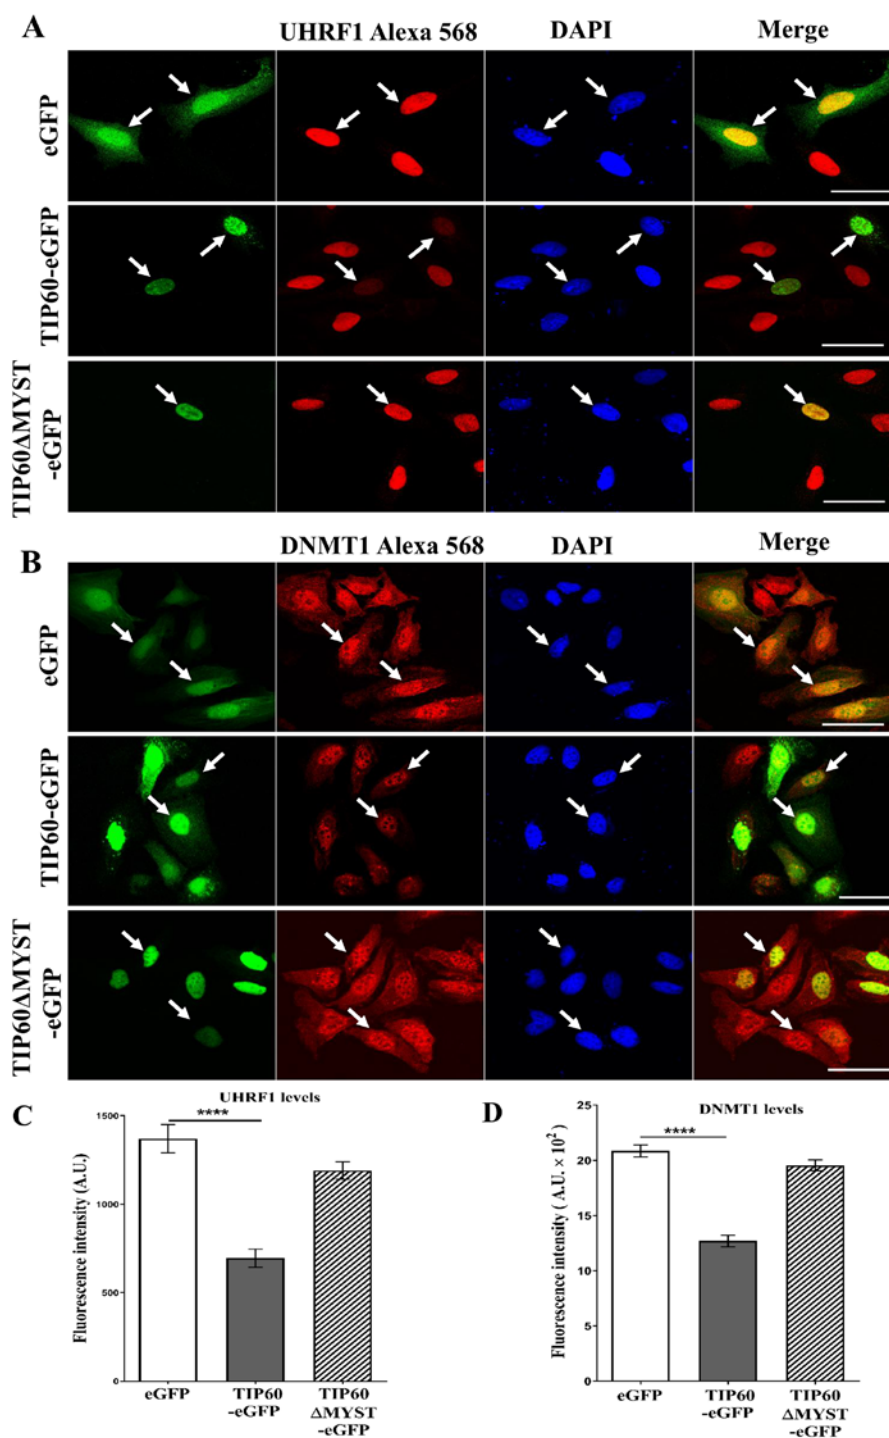

Figure S2. TIP60 overexpression leads to down-regulation of UHRF1 levels (lane 2, - MG-132) (A). One group of samples was treated with 10  $\mu$ M of MG-132 (8 h before cell harvesting). MG-132 treatment lead to improvement in expression levels of UHRF1 in TIP60 transfected sample (lane 2, + MG-132). Of note, the ubiquitination bands and smear were also observed over UHRF1 in TIP60-transfected sample (lane 2, + MG-132). (B) UHRF1 bands were quantified and values are expressed as the mean  $\pm$  SEM for three different experiments which were analyzed statistically by one-way ANOVA with Tukey's post hoc test. \* $P$ <0.05; \*\*\* $P$ <0.0001. UHRF1, ubiquitin-like, containing PHD and RING finger domains 1; TIP60, Tat interactive protein, 60 kDa.

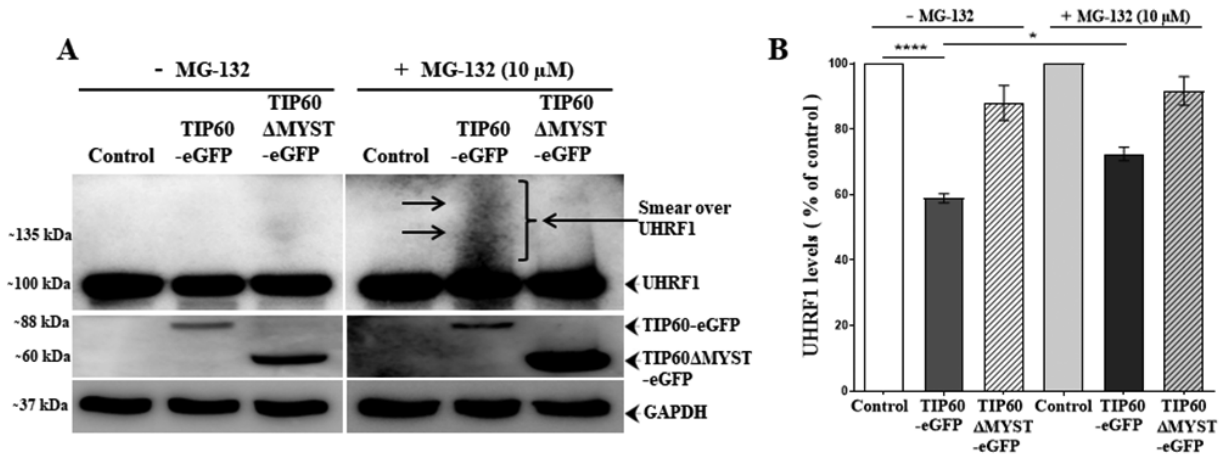

Figure S3. Interaction of UHRF1 and ubiquitin in the presence of the TIP60 inhibitor, NU9056, as monitored by FRET-FLIM. (A) Representative 30x30  $\mu\text{m}$  FLIM images of HeLa cells stably expressing GFP-UHRF1 WT cells and co-transfected with RFP-ubiquitin. The lifetime values are shown by using a color code ranging from red (1.8 ns) to blue (2.5 ns). Scale bar, 10  $\mu\text{m}$ . In comparison to cells expressing only (a) GFP-UHRF1 WT, a marked decrease in the GFP lifetime and thus, a strong FRET efficiency was observed when HeLa cells were (b) transfected with RFP-ubiquitin for 24 h. Following treatment with NU9056 at concentrations of 1, 3 and 5  $\mu\text{M}$  (for 24 h), there was still a considerable FRET (c, d and e), while no FRET was observed for cells treated with 10, 30 and 100  $\mu\text{M}$  concentration (for 24 h) of NU9056 (f, g and h). FLIM data indicate that the TIP60-promoted interaction of UHRF1 with ubiquitin is impaired when the acetyltransferase activity of TIP60 was inhibited by NU9056. (B) Plot of GFP-UHRF1 lifetime as a function of NU9056 concentration. Values are the mean  $\pm$  SEM from two independent experiments. The point at 0 concentration corresponds to the lifetime of GFP-UHRF1 WT co-transfected with RFP-Ubiquitin in the absence of NU9056. FRET efficiency was calculated according to  $E=1-(\tau_{\text{DA}}/\tau_{\text{D}})$ , where  $\tau_{\text{DA}}$  is the lifetime of the donor (GFP) in the presence of acceptor (RFP) and  $\tau_{\text{D}}$  is the lifetime of GFP in the absence of acceptor. UHRF1, ubiquitin-like, containing PHD and RING finger domains 1; TIP60, Tat interactive protein, 60 kDa; FRET, Förster Resonance Energy Transfer.

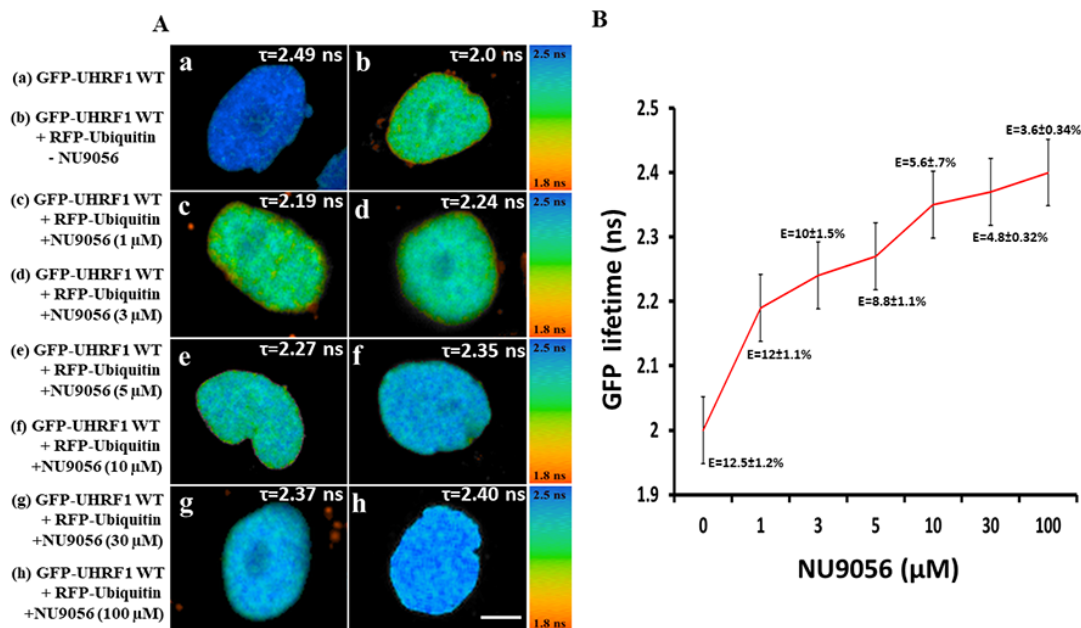

Figure S4. Box plot representing the distribution of the expression of TIP60 (KAT5) in TCGA cancers in comparison to non-tumor samples. Red circle indicates the mean expression of TIP60 (KAT5) in corresponding non-tumor samples. TIP60, Tat interactive protein, 60 kDa. For the list of TCGA cancer types analyzed and their abbreviations, please see Table SI.

### Distribution of the expression of TIP60 (KAT5) in TCGA cancers

○ (red circle) = mean expression in corresponding non-tumour samples

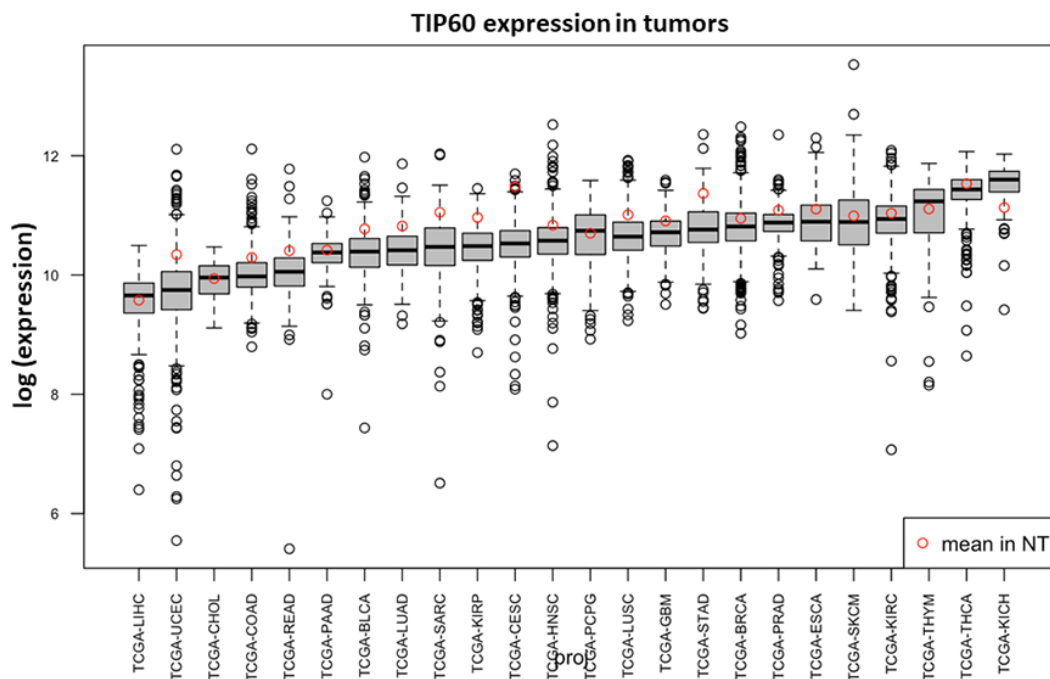

Figure S5. Box plot representing the distribution of the expression of UHRF1 in TCGA cancers in comparison to non-tumor samples. Red circle indicates the mean expression of UHRF1 in corresponding non-tumor samples. UHRF1, ubiquitin-like, containing PHD and RING finger domains 1. For the list of TCGA cancer types analyzed and their abbreviations, please see Table S1.

### Distribution of the expression of UHRF1 in TCGA cancers

○ (red circle) = mean expression in corresponding non-tumour samples

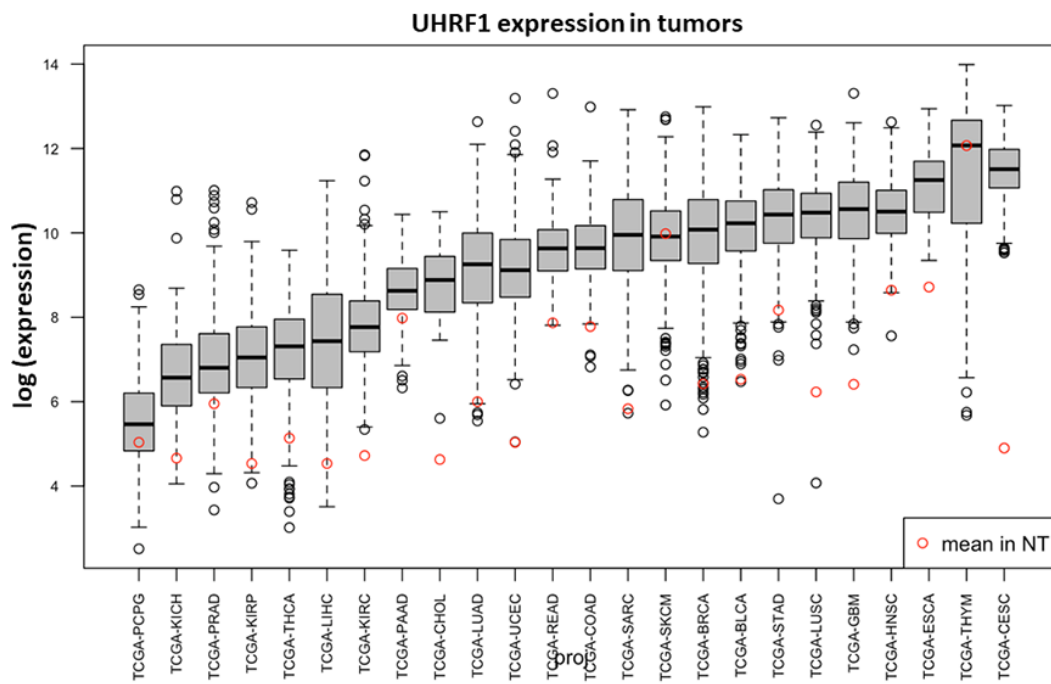

Figure S6. Survival plots representing the association between TIP60/KAT5 expression and survival probability in TCGA cancers (KIRC, LGG). The y-axis represents proportion of survival and the x-axis represents survival time (months). TIP60, Tat interactive protein, 60 kDa. For the list of TCGA cancer types analyzed and their abbreviations, please see Table SI.

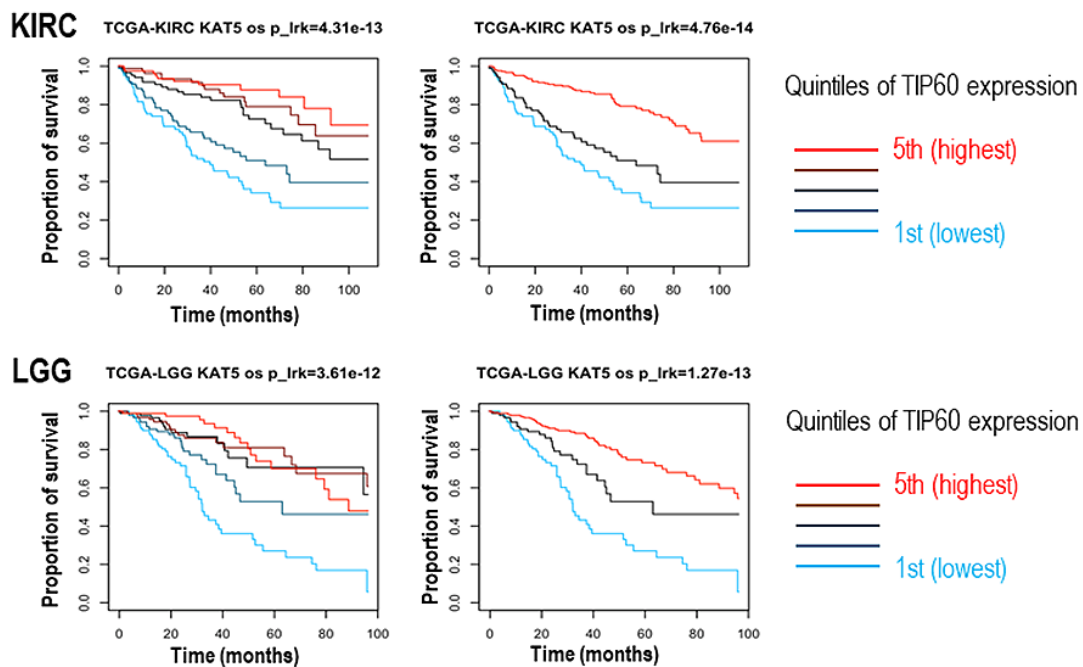

Figure S7. Survival plots representing the association between UHRF1 expression and survival probability in TCGA cancers. The y-axis represents the proportion of survival and the x-axis represents survival time (months). UHRF1, ubiquitin-like, containing PHD and RING finger domains 1. For the list of TCGA cancer types analyzed and their abbreviations, please see Table SI.

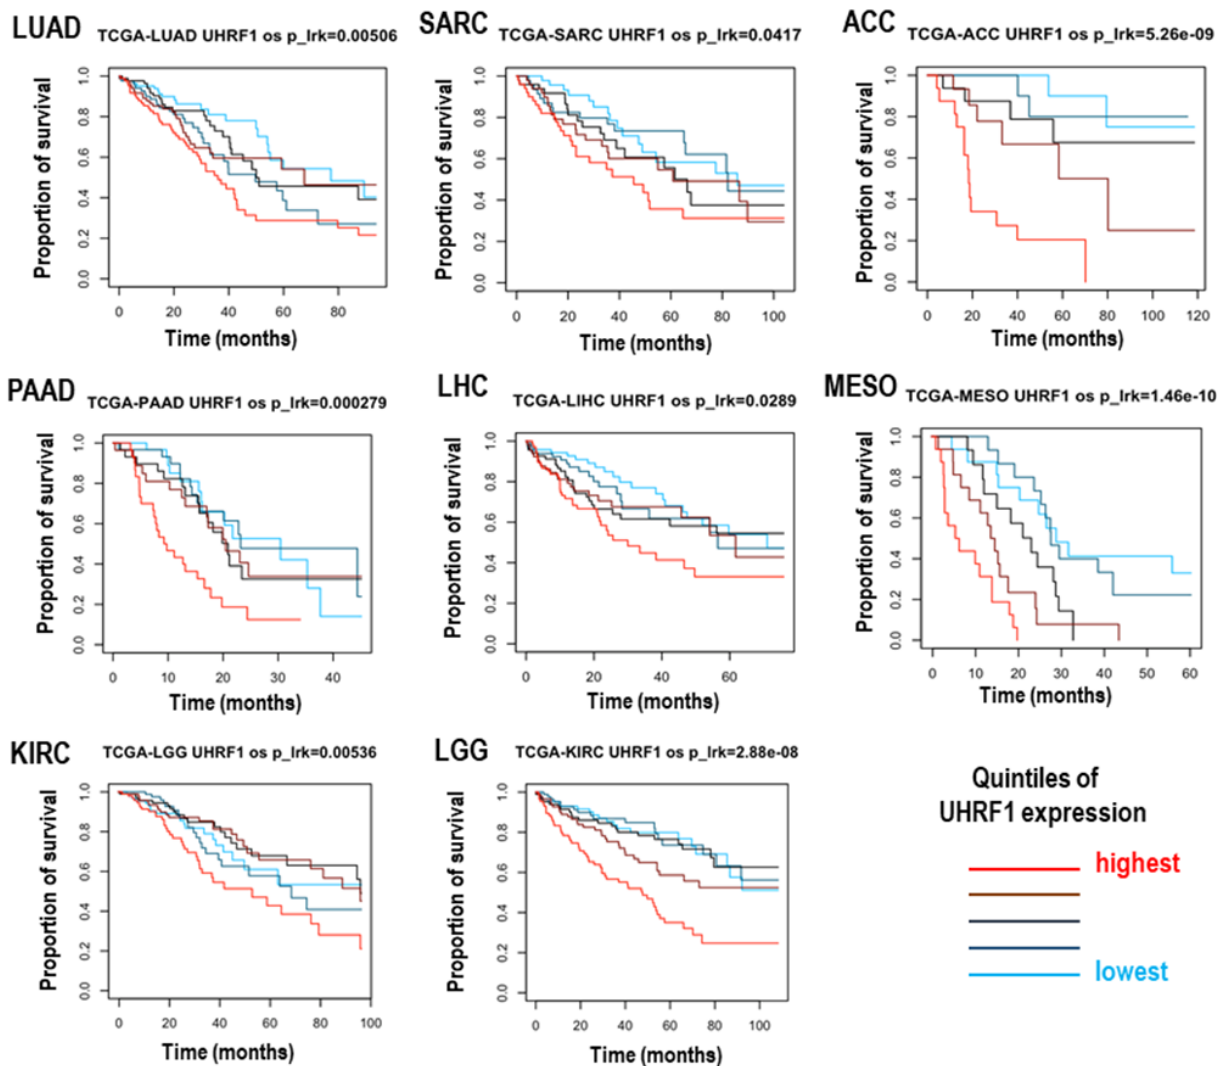

Figure S8. Samples are plotted according to the expression of TIP60/KAT5 (y-axis) and UHRF1 (x-axis) in each of the TCGA cancer types (KIRC, LGG) and effect of this expression on survival. Cancer samples are in red and non-tumor samples in blue. UHRF1, ubiquitin-like, containing PHD and RING finger domains 1; TIP60, Tat interactive protein, 60 kDa. For the list of TCGA cancer types analyzed and their abbreviations, please see Table SI.

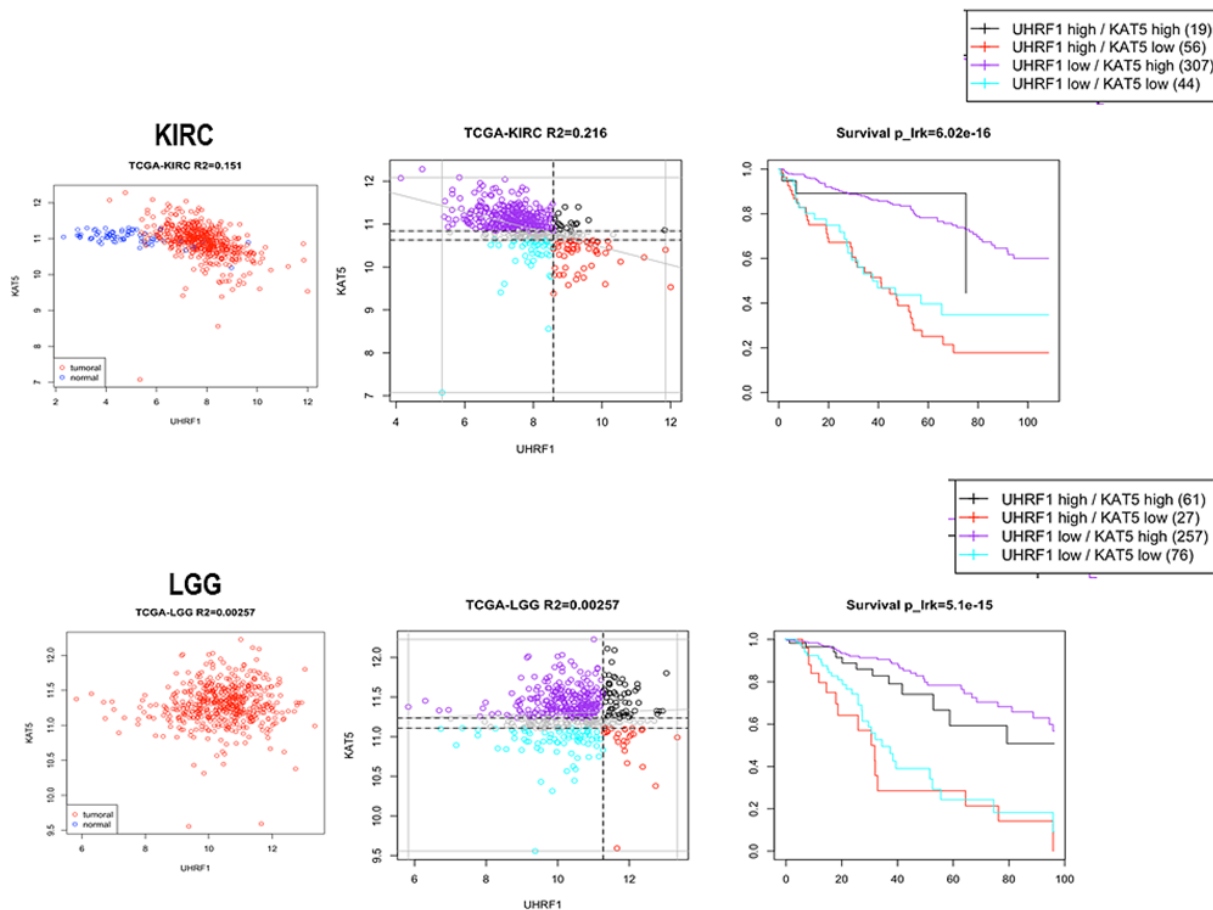



Figure S9. Box plot representing the distribution of the expression of USP7 in TCGA cancers in comparison to non-tumor samples. Red circle indicates mean expression of USP7 in corresponding non-tumor samples. USP7, ubiquitin-specific-processing protease 7. For the list of TCGA cancer types analyzed and their abbreviations, please see Table SI.

### Distribution of the expression of USP7 in TCGA cancers

○ (red circle) = mean expression in corresponding non-tumour samples

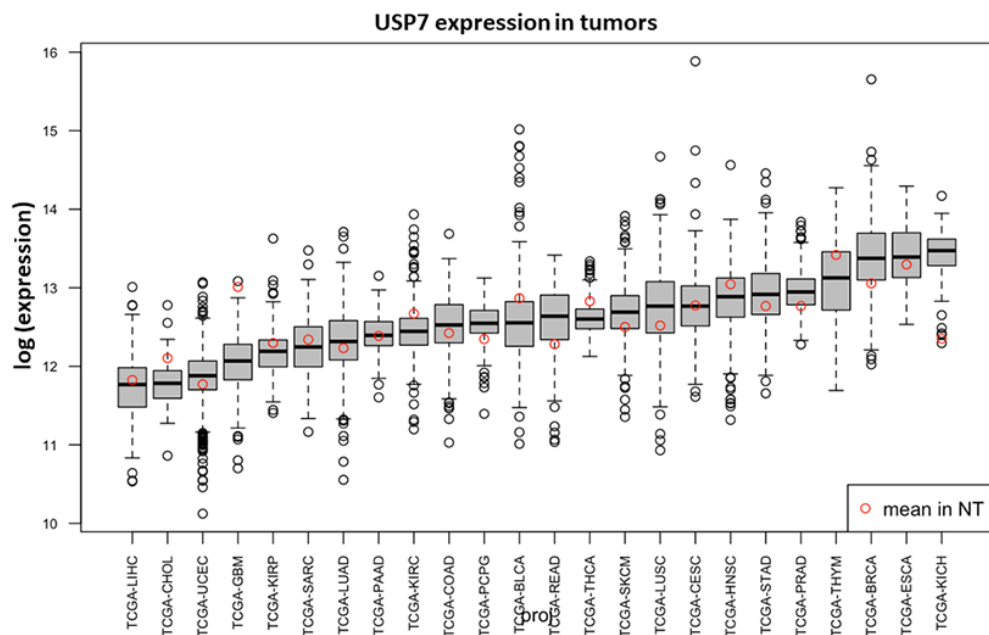

Figure S10. Survival plots representing the association between USP7 expression and survival probability in TCGA-LGG cancer. The y-axis represents the proportion of survival and the x-axis represents survival time (months). USP7, ubiquitin-specific-processing protease 7. For the list of TCGA cancer types analyzed and their abbreviations, please see Table SI.

### Association between USP7 expression and survival probability in TCGA cancers

#### LGG

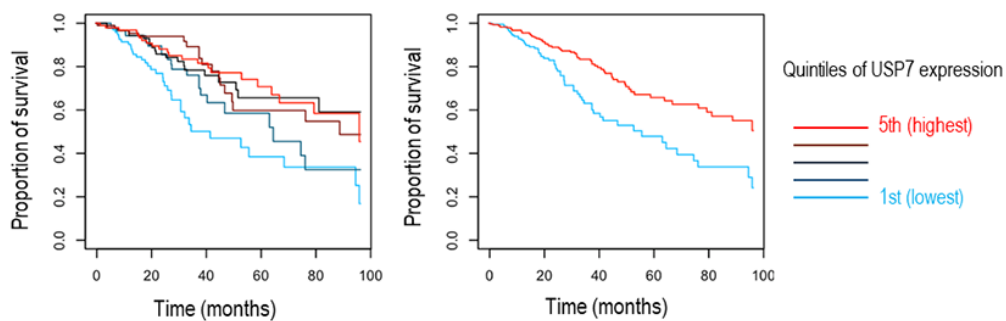

Figure S11. TIP60 is downregulated in cervical cancer. Differential mRNA expression levels of the *TIP60* gene were analyzed in 28 cervical cancer tissues and 24 normal squamous epithelial tissues, with the help of Affymetrix U133A oligonucleotide microarray. A Student's t-test was used to statistically analyze *TIP60* gene expression (\*\*P<0.01). TIP60, Tat interactive protein, 60 kDa.

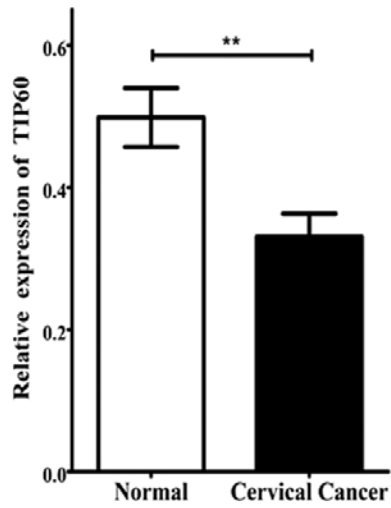

Table SI. List of TCGA cancer types analyzed and their abbreviations.

| Abbreviation | No. of samples | Study name                                                       |
|--------------|----------------|------------------------------------------------------------------|
| TCGA-ACC     | 80             | Adrenocortical carcinoma                                         |
| TCGA-BLCA    | 439            | Bladder urothelial carcinoma                                     |
| TCGA-BRCA    | 1,217          | Breast invasive carcinoma                                        |
| TCGA-CESC    | 312            | Cervical squamous cell carcinoma and endocervical adenocarcinoma |
| TCGA-CHOL    | 45             | Cholangiocarcinoma                                               |
| TCGA-COAD    | 560            | Colon adenocarcinoma                                             |
| TCGA-DLBC    | 48             | Lymphoid neoplasm diffuse Large B-cell lymphoma                  |
| TCGA-ESCA    | 204            | Esophageal carcinoma                                             |
| TCGA-GBM     | 471            | Glioblastoma multiforme                                          |
| TCGA-HNSC    | 604            | Head and neck squamous cell carcinoma                            |
| TCGA-KICH    | 91             | Kidney chromophobe                                               |
| TCGA-KIRC    | 946            | Kidney renal clear cell carcinoma                                |
| TCGA-KIRP    | 352            | Kidney renal papillary cell carcinoma                            |
| TCGA-LAML    | 197            | Acute myeloid leukemia                                           |
| TCGA-LGG     | 534            | Brain lower grade glioma                                         |
| TCGA-LIHC    | 439            | Liver hepatocellular carcinoma                                   |
| TCGA-LUAD    | 714            | Lung adenocarcinoma                                              |
| TCGA-LUSC    | 622            | Lung squamous cell carcinoma                                     |
| TCGA-MESO    | 87             | Mesothelioma                                                     |
| TCGA-OV      | 624            | Ovarian serous cystadenocarcinoma                                |
| TCGA-PAAD    | 195            | Pancreatic adenocarcinoma                                        |
| TCGA-PCPG    | 187            | Pheochromocytoma and paraganglioma                               |
| TCGA-PRAD    | 570            | Prostate adenocarcinoma                                          |
| TCGA-READ    | 814            | Rectum adenocarcinoma                                            |
| TCGA-SARC    | 271            | Sarcoma                                                          |
| TCGA-SKCM    | 475            | Skin cutaneous melanoma                                          |
| TCGA-STAD    | 511            | Stomach adenocarcinoma                                           |
| TCGA-TGCT    | 156            | Testicular germ cell tumors                                      |
| TCGA-THCA    | 580            | Thyroid carcinoma                                                |
| TCGA-THYM    | 126            | Thymoma                                                          |
| TCGA-UCEC    | 599            | Uterine corpus endometrial carcinoma                             |
| TCGA-UCS     | 57             | Uterine carcinosarcoma                                           |
| TCGA-UVM     | 80             | Uveal melanoma                                                   |
